# Supplementary material for: Silica-supported isolated molybdenum di-oxo species: formation and activation with organosilicon agent for olefin metathesis
Source: Royal Society of Chemistry journal article supplement (doi:10.1039/c8cc01876f), 2018-01-01
Supplement: c8cc01876f1.zip [file c8cc01876f1.zip]

# Supporting Information

## **Silica-Supported Isolated Molybdenum Di-oxo Species: Formation and Activation with Organosilicon Agent for Olefin Metathesis**

Keishi Yamamoto, Ka Wing Chan, Victor Mougel, Haruki Nagae, Hayato Tsurugi, Olga V. Safonova, Kazushi Mashima, and Christophe Copéret

|                                            |     |
|--------------------------------------------|-----|
| A) General Procedures                      | S2  |
| B) Syntheses                               | S3  |
| C) Single Crystals XRD                     | S5  |
| D) Infrared (IR) Spectra                   | S6  |
| E) Solid State NMR                         | S7  |
| F) UV-Vis DRS spectra                      | S8  |
| G) XAS                                     | S9  |
| H) EPR Spectroscopy                        | S10 |
| I) Catalytic Activity                      | S11 |
| J) Titration of Active Site Using Ethylene | S18 |
| K) References                              | S18 |

## A) General Procedures

All experiments were carried out under dry and oxygen free argon atmosphere using either standard Schlenk or glove-box techniques for organometallic synthesis. For the synthesis of grafted catalysts, reactions were carried out using glove-box techniques. High vacuum lines ( $10^{-5}$  mbar) were used to remove volatiles from the surface of silica materials. Pentane, toluene, and diethyl ether were purified using double MBraun SPS alumina column, and were degassed using three freeze-pump-thaw cycles before being used. DME and THF were distilled from Na/Benzophenone. Silica (Aerosil Degussa,  $200 \text{ m}^2 \cdot \text{g}^{-1}$ ) was compacted according to a literature method.<sup>1</sup>  $\text{SiO}_{2-700}$  was obtained by calcination at  $500^\circ\text{C}$  under air for 4 h and treated under vacuum ( $10^{-5}$  mbar) at  $500^\circ\text{C}$  for 12 h, and then at  $700^\circ\text{C}$  for 20 h and contained 0.31 mmol of OH per gram as measured by titration with  $\text{Mg}(\text{CH}_2\text{Ph})_2$ .

All infrared (IR) spectra were recorded using a Bruker  $\alpha$ -T spectrometer placed in an Ar glovebox, equipped with OPUS software. A typical experiment consisted in the measurement of transmission in 32 scans in the region from  $4000$  to  $400 \text{ cm}^{-1}$ .

The  $^1\text{H}$  and  $^{13}\text{C}$ -NMR spectra were obtained on Bruker Avance III 400 Bruker spectrometer equipped with a 4 mm probe. Cross polarization magic angle spinning (CPMAS) was used to measure  $^{13}\text{C}$  and  $^1\text{H}$ , respectively. The radio frequency (RF) field of proton was always set to 100 kHz while the  $^1\text{H}$  decoupling was set to 80 kHz. The solution spectra were recorded in  $\text{C}_6\text{D}_6$  at room temperature.

UV-Vis spectra of all materials were obtained using a Varian Cary UV-vis spectrophotometer equipped with a Praying Mantis integration sphere. The UV-vis spectra were processed with Microsoft Excel software. The edge energy (Eg) for allowed transitions was determined by finding the intercept of the straight line in the low-energy rise of a plot of  $h\nu$  vs  $[\text{F}(\text{R}_\infty)h\nu]^2$ .

Continuous Wave (CW) EPR spectra were measured at X band (9.5-GHz microwave frequency) on a Bruker EMX spectrometer at 110 K.

XAS measurements were carried out at the Mo K edge at the SuperXAS beamline at SLS (PSI, Villigen, Switzerland). The storage ring was operated at 2.4 GeV in top-up mode with a ring current of around 400 mA. The incident photon beam provided by a 2.9 T super bend magnet source was selected by a Si (311) quick-EXAFS monochromator and the rejection of higher harmonics and focusing were achieved by a rhodium-coated collimating mirror at 2.8 mrad and a rhodium-coated toroidal mirror at 2.5 mrad. The beam size on the sample was  $100 \times 100 \mu\text{m}$ . During the measurements the monochromator was rotating with 10 Hz frequency in 2 deg angular range and X-ray absorption spectra were collected in transmission mode using ionization chambers specially developed for quick data collection with 1 MHz frequency.<sup>2</sup> The spectra were collected for 2 minutes and averaged. The beamline energy was calibrated with Mo reference foil to the Mo K-edge position at 20000.0 eV. To avoid contact with air all samples were sealed in a glovebox. Each pellet of samples (with optimized thickness for transmission detection) was placed in two aluminized plastic bags (Polyaniline ( $15 \mu\text{m}$ ), polyethylene ( $15 \mu\text{m}$ ), Al ( $12 \mu\text{m}$ ), polyethylene ( $75 \mu\text{m}$ ) from Gruber-Folien GmbH & Co. KG, Straubing, Germany) using an impulse sealer inside a glovebox; one sealing layer was removed immediately before the measurements. Data were analyzed by standard procedures<sup>3</sup> using Ifeffit program package.<sup>4</sup>

Molecular compounds,  $\text{MoO}_2\text{Cl}_2(\text{dme})$ ,<sup>5</sup>  $\text{Mo}(\text{O})_2[\text{OSi}(\text{OtBu})_3]_2$ ,<sup>6</sup> and 2,3,5,6-tetramethyl-1,4-bis(trimethylsilyl)-1,4-diaza-2,5-cyclohexadiene ( $\text{Me}_4\text{BTDP}$ )<sup>7</sup> were synthesized according to literature procedures.  $\text{MoO}_2\text{Cl}_2$  was purchased from Aldrich and used without purification.

## B) Syntheses

### Synthesis of $\text{Mo}(\text{O})_2[\text{OSi}(\text{OtBu})_3]_2$

To a solution of  $\text{MoO}_2\text{Cl}_2(\text{dme})$  (2.50 g, 8.65 mmol) in toluene (100 mL) and DME (2 mL) cooled to  $-78^\circ\text{C}$  was added dropwise over 1 h a solution of  $\text{Li}[\text{OSi}(\text{OtBu})_3]$  (4.68 g, 17.3 mmol) in toluene (50 mL). The reaction mixture was allowed to warm to room temperature, and then stirred for 3 h. All volatiles were removed under reduced pressure to give a white solid, which was extracted with pentane ( $4 \times 20$  mL). Concentration of solution and cooling to  $-30^\circ\text{C}$  overnight afforded  $\text{Mo}(\text{O})_2[\text{OSi}(\text{OtBu})_3]_2$  as colorless crystals (4.53 g, 6.91 mmol, 80% yield).  $^1\text{H}$  NMR (300 MHz,  $\text{C}_6\text{D}_6$ , rt):  $\delta$  1.39 (s, 54H,  $\text{OCMe}_3$ ).  $^{13}\text{C}\{^1\text{H}\}$  NMR (75 MHz,  $\text{C}_6\text{D}_6$ , rt):  $\delta$  74.0 (s,  $\text{OCMe}_3$ ), 31.6 (s,  $\text{OCMe}_3$ ).

### Preparation of **1**: Grafting of $\text{Mo}(\text{O})_2[\text{OSi}(\text{OtBu})_3]_2$ on $\text{SiO}_{2-700}$

A solution of  $\text{Mo}(\text{O})_2[\text{OSi}(\text{OtBu})_3]_2$  (853 mg, 1.30 mmol) in  $\text{C}_6\text{H}_6/\text{DME}$  (15 mL/1.5 mL) was added to a suspension of  $\text{SiO}_{2-700}$  (4.00 g,  $\text{SiOH}$  of 1.24 mmol) in  $\text{C}_6\text{H}_6/\text{DME}$  (5 mL/0.5 mL) at room temperature. The resulting suspension was stirred (100 rpm) at room temperature for 16 h. The supernatant was removed and the resulting solid was washed with  $\text{C}_6\text{H}_6$  (7 mL  $\times$  3). The solid was thoroughly dried under high vacuum ( $10^{-5}$  mbar) at room temperature for 5 hours to give  $(\equiv\text{SiO})\text{Mo}(\text{O})_2[\text{OSi}(\text{OtBu})_3]$  (**1**) as a white powder. The supernatant and washing solutions were collected and analyzed by  $^1\text{H}$  NMR spectroscopy in  $\text{C}_6\text{D}_6$  using ferrocene as an internal standard, indicating the consumption of 0.54 equiv of  $\text{Mo}(\text{O})_2[\text{OSi}(\text{OtBu})_3]_2$  and the release of 0.42 equiv. of  $\text{HOSi}(\text{OtBu})_3$  upon grafting.

Elemental Analysis: Mo 1.52%

IR ( $\text{cm}^{-1}$ ): 1367 (s), 1392 (m), 1464 (m), 2832 (m), 2879 (m), 2908 (m), 2939 (m), 2979 (s), 3745 (m).

IR spectrum of **1** is given in Figure S2.

### Preparation of **2**: Thermal decomposition of $(\equiv\text{SiO})\text{Mo}(\text{O})_2[\text{OSi}(\text{OtBu})_3]$ (**1**) and calcination

$(\equiv\text{SiO})\text{Mo}(\text{O})_2[\text{OSi}(\text{OtBu})_3]$  (**1**) was loaded into a reactor and placed under high vacuum ( $10^{-5}$  mbar) at  $200^\circ\text{C}$  ( $1^\circ\text{C}/\text{min}$ ) for 3 h, then heated at  $400^\circ\text{C}$  ( $1^\circ\text{C}/\text{min}$ ) for 8 h. The reactor was cooled to ambient temperature under vacuum, and the resulting powder was loaded into a flow reactor, then calcined at  $400^\circ\text{C}$  ( $1^\circ\text{C}/\text{min}$ ) for 3 h to give  $(\equiv\text{SiO})_2\text{Mo}(\text{O})_2$  (**2**) as a white powder.

Elemental analysis: Mo 1.56 wt% (0.163 mmol/g)

IR ( $\text{cm}^{-1}$ ): 3745 (s).

IR spectrum of **2** is given in Figure S2.

**Preparation of 2-(Me<sub>4</sub>BTDP)<sub>x</sub>: Reduction of 2 with Me<sub>4</sub>BTDP**

In a 20 mL Schlenk tube, a solution of Me<sub>4</sub>BTDP (18.4 mg, 0.0651 mmol, 1 equiv. to Mo) in C<sub>6</sub>H<sub>6</sub> (1 mL) was added to a suspension of **2** (400 mg, 0.0652 mmol) in C<sub>6</sub>H<sub>6</sub> (1 mL) at room temperature. The reaction suspension was slowly stirred at 70 °C for 4 h, resulting in colour change of the material from white to brown. After the supernatant was decanted, the residual solid was washed with C<sub>6</sub>H<sub>6</sub> (1 mL × 3). The resulting solid was dried thoroughly under high vacuum (10<sup>-5</sup> mbar) at room temperature for more than 3 h to afford **2-(Me<sub>4</sub>BTDP)<sub>1</sub>** as a brown powder. The supernatant and washing solutions were combined and analysed by <sup>1</sup>H NMR spectroscopy in C<sub>6</sub>D<sub>6</sub> using ferrocene as an internal standard. Similarly, **2-(Me<sub>4</sub>BTDP)<sub>2</sub>**, which is a purple-brown powder, was prepared.

IR (cm<sup>-1</sup>) of **2-(Me<sub>4</sub>BTDP)<sub>1</sub>**: 3741 (s), 3694 (br), 2960 (m), 2904 (m), 1448 (m), 1415 (m).

IR (cm<sup>-1</sup>) of **2-(Me<sub>4</sub>BTDP)<sub>2</sub>**: 3694 (br), 2959 (s), 2902 (m), 1445 (m), 1415 (m).

IR of the material are given in Figure S3.

**Table S1.** Summary of the results of the reduction.

| Equiv. of Me <sub>4</sub> BTDP to Mo | Consumption of Me <sub>4</sub> BTDP | Released Me <sub>4</sub> -pyrazine | Released HMDSO | Name of the material                      |
|--------------------------------------|-------------------------------------|------------------------------------|----------------|-------------------------------------------|
| 1 equiv.                             | 0.065 mmol                          | 0.015 mmol                         | 0.013 mmol     | <b>2-(Me<sub>4</sub>BTDP)<sub>1</sub></b> |
| 2 equiv.                             | 0.110 mmol                          | 0.057 mmol                         | 0.013 mmol     | <b>2-(Me<sub>4</sub>BTDP)<sub>2</sub></b> |

## C) Single Crystals XRD

a)

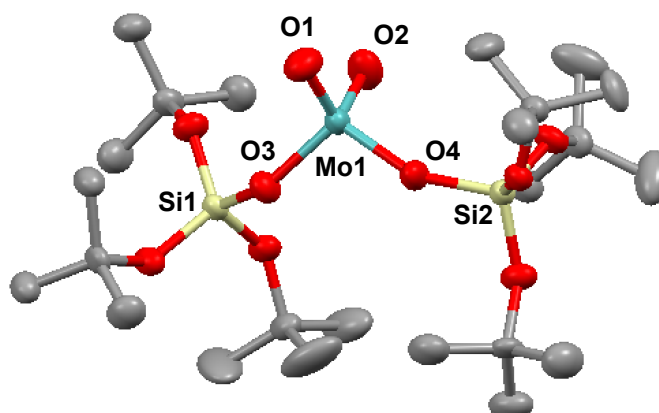

**Figure S1.** Thermal ellipsoid plot at the 50% probability of  $\text{Mo}(\text{O})_2[\text{OSi}(\text{OtBu})_3]_2$ . Hydrogen atoms were omitted and only one of the two independent molecules in the asymmetric unit have been represented for clarity.

**Table S2.** Selected bonds and angles for  $\text{Mo}(\text{O})_2[\text{OSi}(\text{OtBu})_3]_2$  (distances are given in Å).

|        |          |
|--------|----------|
| Mo1–O1 | 1.689(4) |
| Mo1–O2 | 1.665(4) |
| Mo1–O3 | 1.845(4) |
| Mo1–O4 | 1.840(4) |

**Table S3.** Crystallographic data for  $\text{Mo}(\text{O})_2[\text{OSi}(\text{OtBu})_3]$ .

|                                      |                                                        |
|--------------------------------------|--------------------------------------------------------|
| formula                              | $\text{MoSi}_2\text{O}_{10}\text{C}_{24}\text{H}_{54}$ |
| crystal size (nm)                    | $0.42 \times 0.08 \times 0.08$                         |
| crystal system                       | monoclinic                                             |
| space group                          | $P2_1/c$ (#14)                                         |
| volume (Å <sup>3</sup> )             | 7006(3)                                                |
| a (Å)                                | 16.151(5)                                              |
| b (Å)                                | 27.037(8)                                              |
| c (Å)                                | 16.893(5)                                              |
| $\alpha$ (°)                         | —                                                      |
| $\beta$ (°)                          | 108.232(5)                                             |
| $\gamma$ (°)                         | —                                                      |
| Z                                    | 8                                                      |
| formula weight (g/mol)               | 654.79                                                 |
| density (g cm <sup>-3</sup> )        | 1.242                                                  |
| F(000)                               | 2784.0                                                 |
| temp (K)                             | 100(2)                                                 |
| total no. reflections                | 36518                                                  |
| unique reflections [R(int)]          | 12370 ( $R_{\text{int}} = 0.0993$ )                    |
| Final R indices [ $I > 2\sigma(I)$ ] | $R_1 = 0.0710$ , $wR_2 = 0.1184$                       |
| GOF                                  | 1.049                                                  |

## D) Infrared (IR) spectra

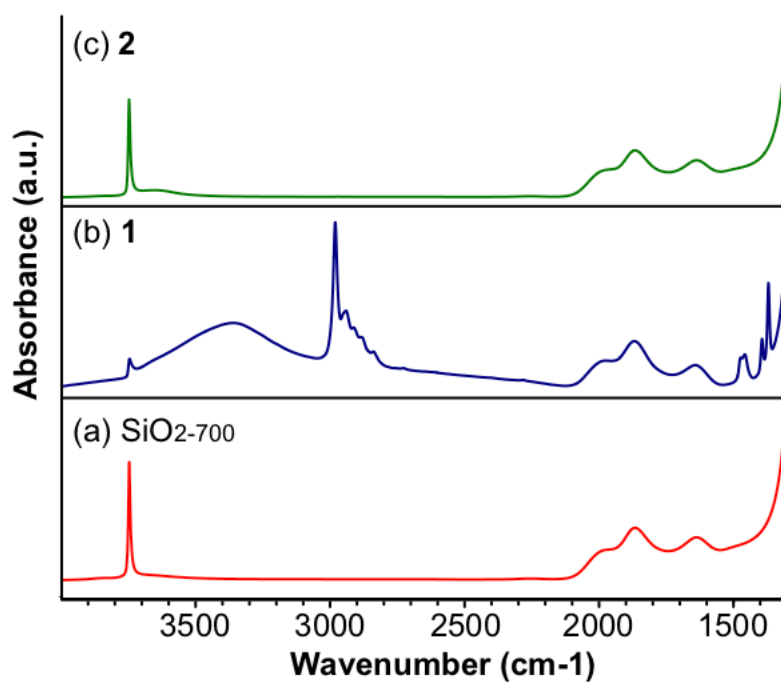

Figure S2. IR spectra of SiO<sub>2-700</sub>, 1, and 2.

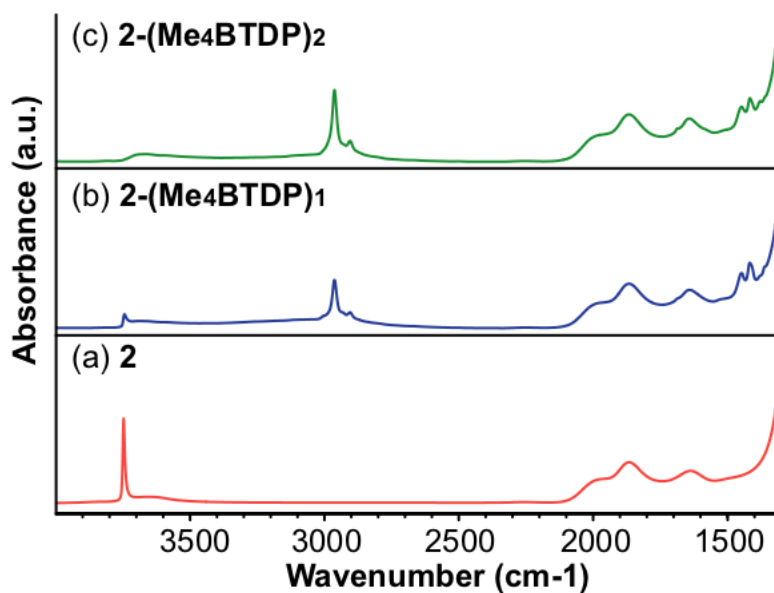

Figure S3. IR spectra of 2, 2-(Me<sub>4</sub>BTDP)<sub>1</sub>, 2-(Me<sub>4</sub>BTDP)<sub>2</sub>.

## E) Solid State NMR

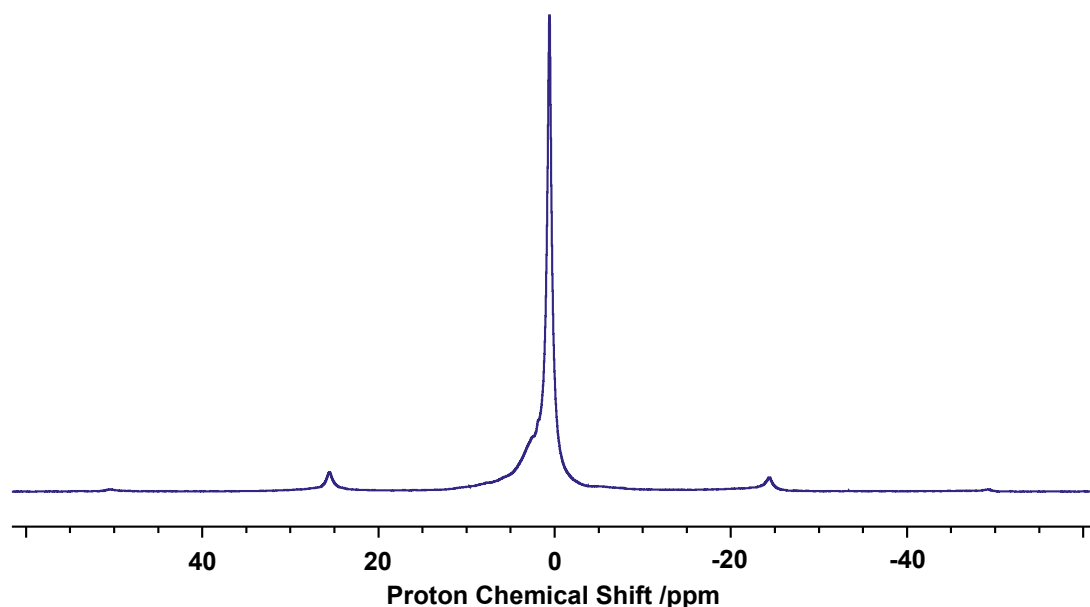

**Figure S4.**  $^1\text{H}$  NMR spectrum (400 MHz, spinning rate 10 kHz, 4 mm rotor) of the material after the reaction of **2-(Me<sub>4</sub>BTDP)<sub>1</sub>** with ethylene at 70 °C for 2 h, followed by  $^{13}\text{C}$  dilabeled ethylene.

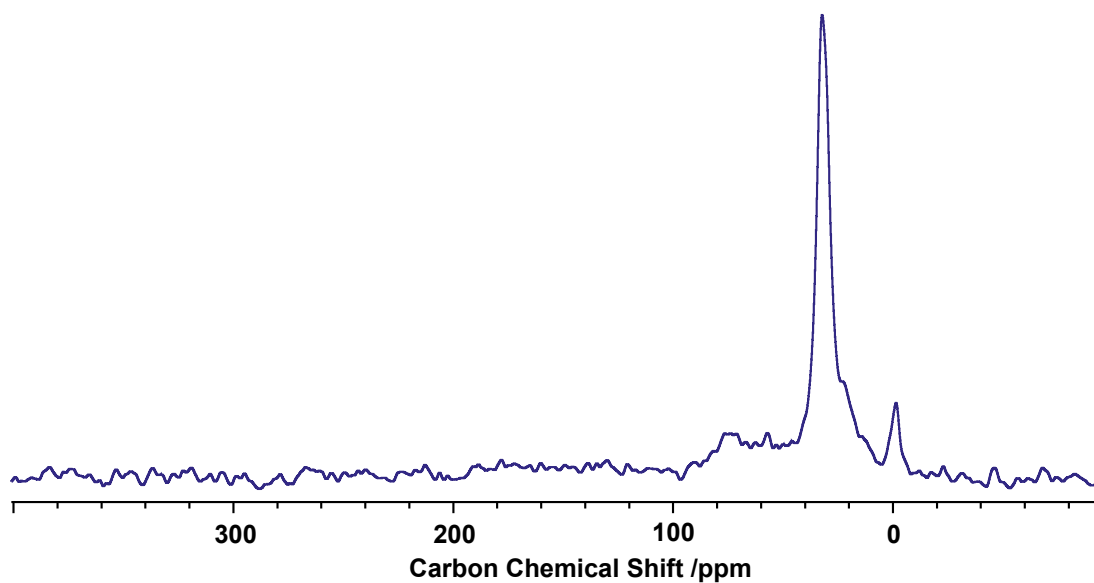

**Figure S5.**  $^{13}\text{C}\{^1\text{H}\}$  NMR spectrum (100 MHz, spinning rate 10 kHz, 4 mm rotor) of the material after the reaction of **2-(Me<sub>4</sub>BTDP)<sub>1</sub>** with ethylene at 70 °C for 2 h, followed by  $^{13}\text{C}$  dilabeled ethylene. The contact time for CP was 2 ms, and the recycle delay was 1 s.

## F) UV-Vis DRS spectra

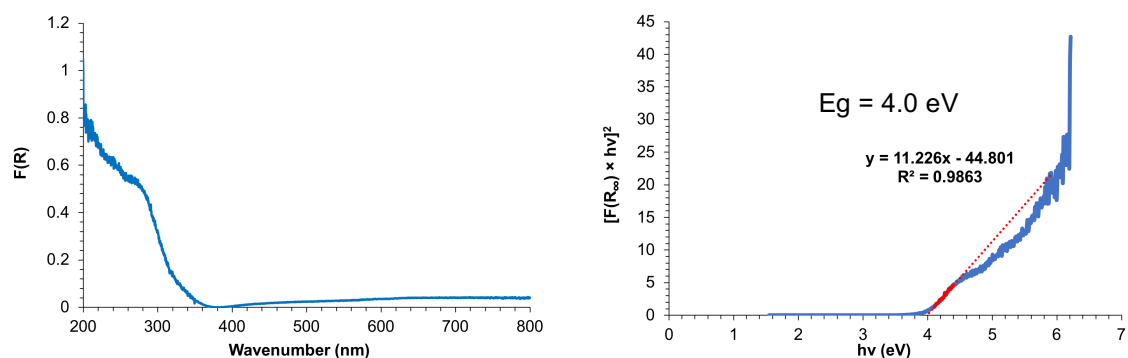

**Figure S6.** UV-vis diffuse reflectance spectrum and the  $E_g$  value of  $\text{Mo}(\text{O})_2[\text{OSi}(\text{OtBu})_3]_2$ .

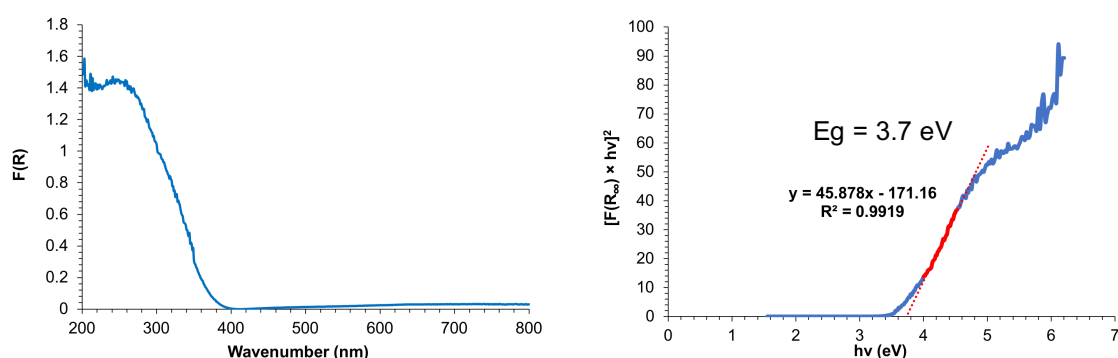

**Figure S7.** UV-vis diffuse reflectance spectrum and the  $E_g$  value of 1.

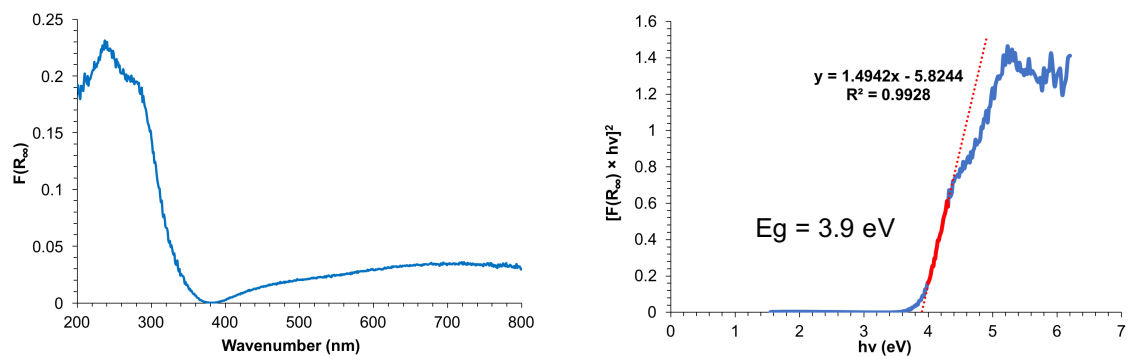

**Figure S8.** UV-vis diffuse reflectance spectrum and the  $E_g$  value of 2.

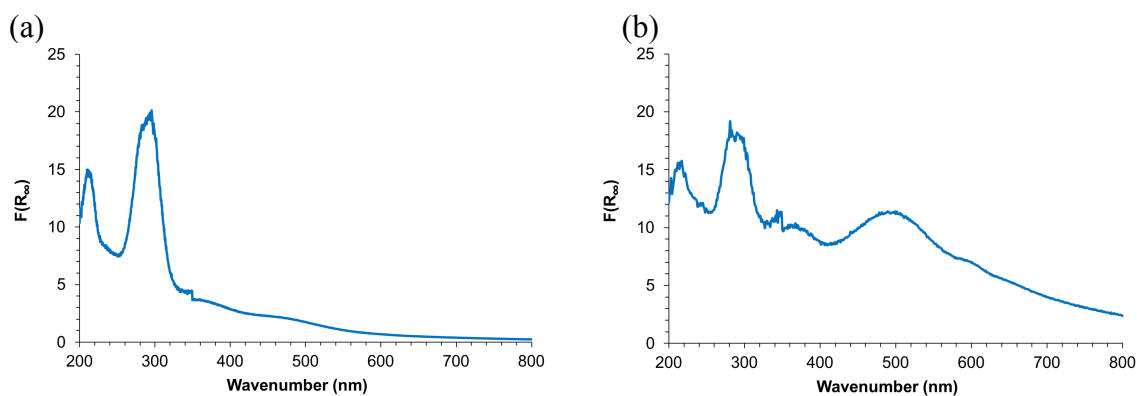

**Figure S9.** UV-vis diffuse reflectance spectra of (a)  $2-(\text{Me}_4\text{BTDP})_1$  and (b)  $2-(\text{Me}_4\text{BTDP})_2$ .



## G) XAS

### XAS characterization of $(\equiv\text{SiO})\text{Mo}(\text{O})_2[\text{OSi}(\text{OtBu})_3]$ (**1**)

**Table S4.** EXAFS fit parameters for **1**.  $S_0^2 = 1.039$ ;  $\Delta E_0$  (eV) = 1 (2); k range 3-13  $\text{\AA}^{-1}$ ; R range 1-3.7  $\text{\AA}$ . Values without errors were fixed in the EXAFS fits.

| Atoms | No. of neighbor | $\sigma^2$ ( $\text{\AA}^2$ ) | R ( $\text{\AA}$ ) |
|-------|-----------------|-------------------------------|--------------------|
| O     | 2               | 0.0030 (3)                    | 1.723 (5)          |
| O     | 2               | 0.0035 (5)                    | 1.952 (7)          |
| O     | 1               | 0.006 (2)                     | 2.39 (2)           |
| Si    | 1               | 0.005 (2)                     | 3.31 (2)           |
| Si    | 1               | 0.005 (2)                     | 3.43 (2)           |

### XAS characterization of $(\equiv\text{SiO})_2\text{Mo}(\text{O})_2$ (**2**)

**Table S5.** EXAFS fit parameters for **2**.  $S_0^2 = 1.039$ ;  $\Delta E_0$  (eV) = 0 (2); k range 3-13  $\text{\AA}^{-1}$ ; R range 1-3.7  $\text{\AA}$ . Values without errors were fixed in the EXAFS fits.

| Atoms | No. of neighbor | $\sigma^2$ ( $\text{\AA}^2$ ) | R ( $\text{\AA}$ ) |
|-------|-----------------|-------------------------------|--------------------|
| O     | 2               | 0.0021 (3)                    | 1.699 (5)          |
| O     | 2               | 0.0026 (4)                    | 1.921 (6)          |
| Si    | 1               | 0.011 (7)                     | 3.39 (5)           |
| Si    | 1               | 0.011 (7)                     | 3.52 (5)           |

### XANES white line energy

**Table S6.** XANES edge energies of  $\text{Mo}(\text{O})_2[\text{OSi}(\text{OtBu})_3]_2$ , **1**, **2**, **2-(Me<sub>4</sub>BTDP)<sub>1</sub>**, **2-(Me<sub>4</sub>BTDP)<sub>2</sub>**.

| Sample                                               | Edge energy (eV) |
|------------------------------------------------------|------------------|
| $\text{Mo}(\text{O})_2[\text{OSi}(\text{OtBu})_3]_2$ | 20014.9          |
| <b>1</b>                                             | 20014.9          |
| <b>2</b>                                             | 20014.9          |
| <b>2-(Me<sub>4</sub>BTDP)<sub>1</sub></b>            | 20014.5          |
| <b>2-(Me<sub>4</sub>BTDP)<sub>2</sub></b>            | 20013.2          |

## H) EPR spectroscopy

All measurements were conducted at X band (9.5-GHz electron paramagnetic resonance (EPR) frequency) at 110 K. Attenuation was varied such that no saturation was observed.

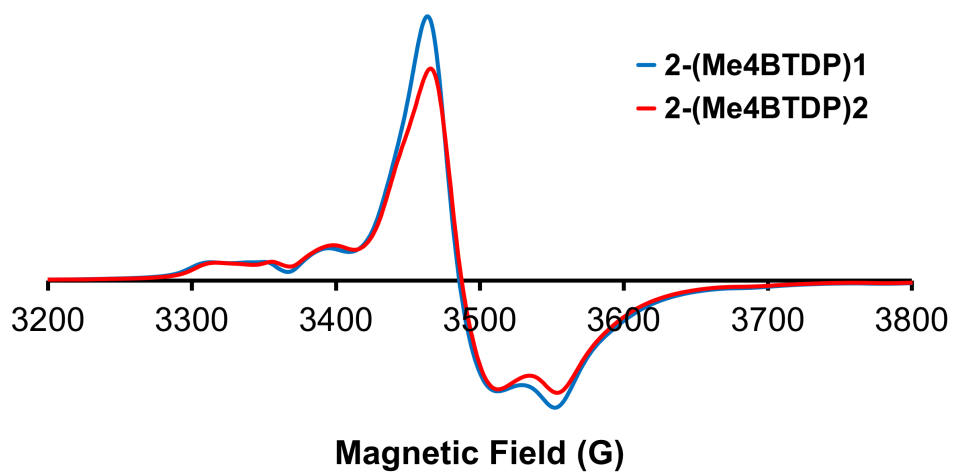

**Figure S10.** EPR spectra of 2-(Me<sub>4</sub>BTDP)<sub>1</sub> and 2-(Me<sub>4</sub>BTDP)<sub>2</sub>.

## I) Catalytic Activity

### Metathesis reaction of *cis*-4-nonene at 70 °C catalyzed by **2** in the presence of M<sub>4</sub>BTDP

The catalyst **2** (3.0 mg, 0.49 μmol of Mo) was loaded in a conical base vial with a wing shaped magnetic stirring bar. A solution of *cis*-4-nonene (0.9832 M) in toluene containing heptane as an internal standard (0.1069 M) and Me<sub>4</sub>BTDP (0.2, 0.5, 1, 2, 5 equiv.) were added to the vial (eq. 1). The reaction mixture was stirred at 600 rpm and kept at 70 °C using an aluminum heating block. 5 μL of aliquots of the solution were drawn, and then diluted with pure toluene (100 μL). The resulting solution was analyzed by GC/FID (Agilent Technologies 7890 A) equipped with an HP-5 (Agilent Technologies) column. Conversion is given by eq. 2, that is without taking into account *cis*/*trans* isomerization of 4-nonene. Equilibrium conversion is reached at ca. 51%.

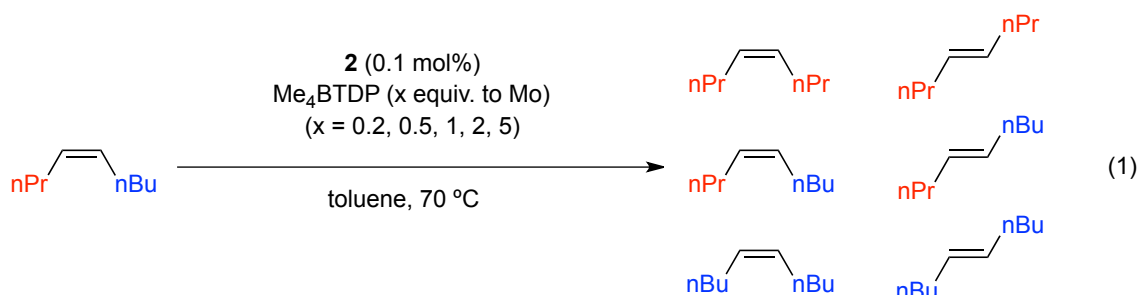

$$\text{Product conversion (t)} = \frac{[\text{cis/trans-4-octene}]_t + [\text{cis/trans-5-decene}]_t}{[\text{cis-4-nonene}]_{\text{int}}} \quad (2)$$

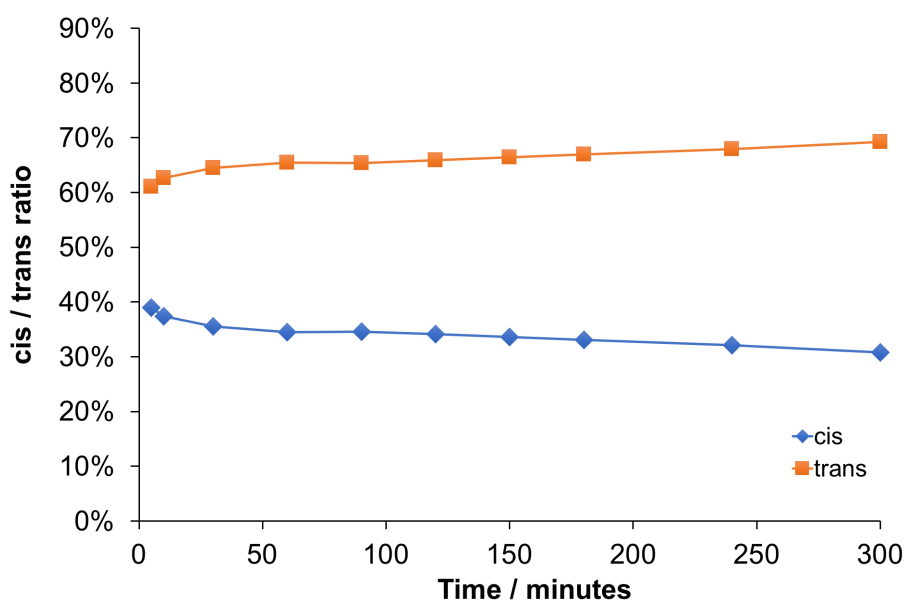

**Figure S11.** The *cis*-*trans* ratio of the 4-octene vs time, *cis*-4-nonene self-metathesis catalyzed by **2** and 0.2 equiv. of Me<sub>4</sub>BTDP.

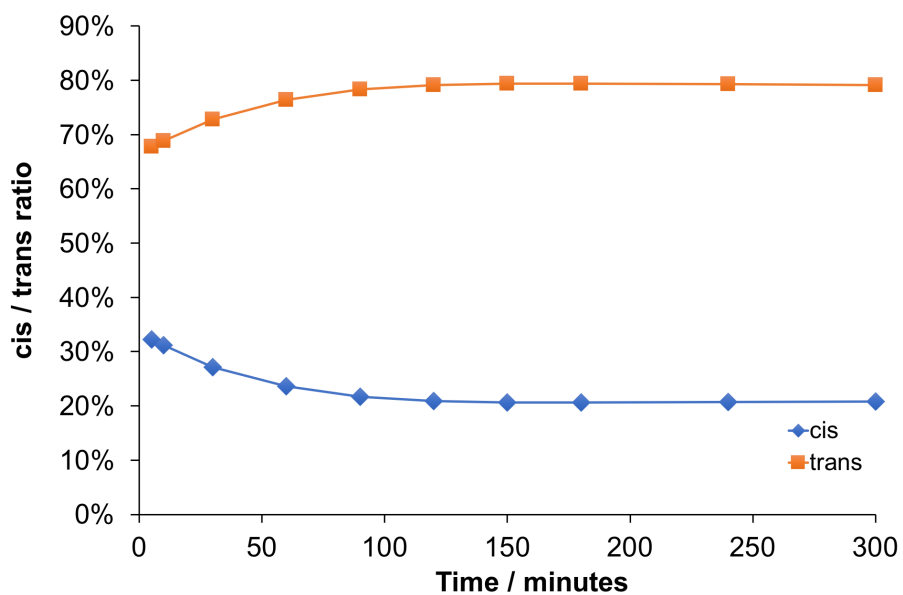

**Figure S12.** The cis-trans ratio of 4-octene vs time, *cis*-4-nonene self-metathesis catalyzed by **2** and 0.5 equiv. of Me<sub>4</sub>BTDP.

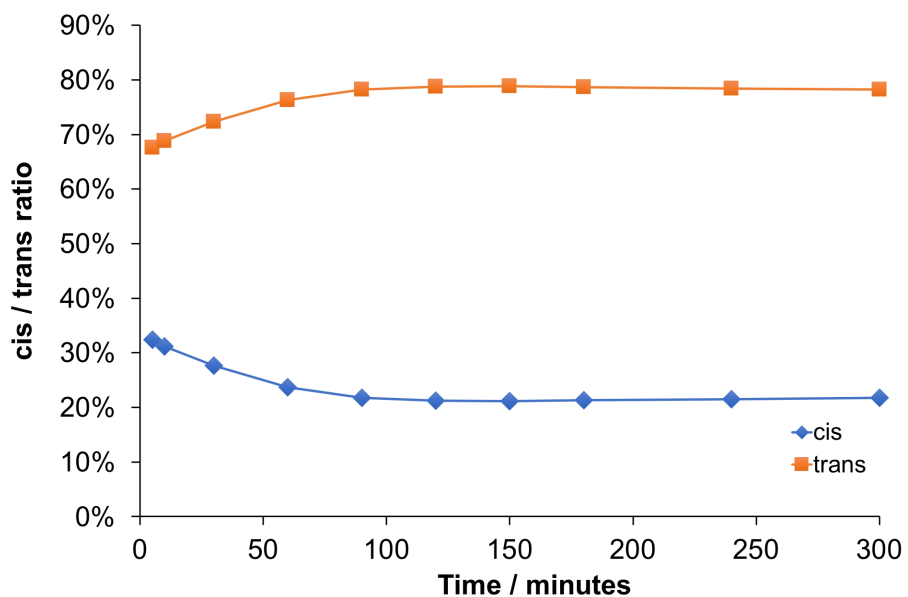

**Figure S13.** The cis-trans ratio of 4-octene vs time, *cis*-4-nonene self-metathesis catalyzed by **2** and 1 equiv. of Me<sub>4</sub>BTDP.

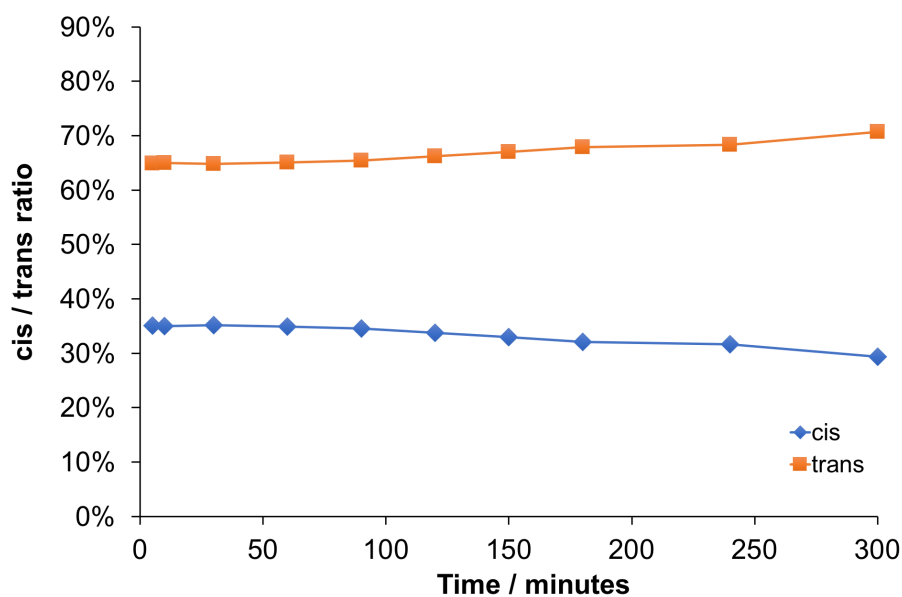

**Figure S14.** The cis-trans ratio of 4-octene vs time, *cis*-4-nonene self-metathesis catalyzed by **2** and 2 equiv. of Me<sub>4</sub>BTDP.

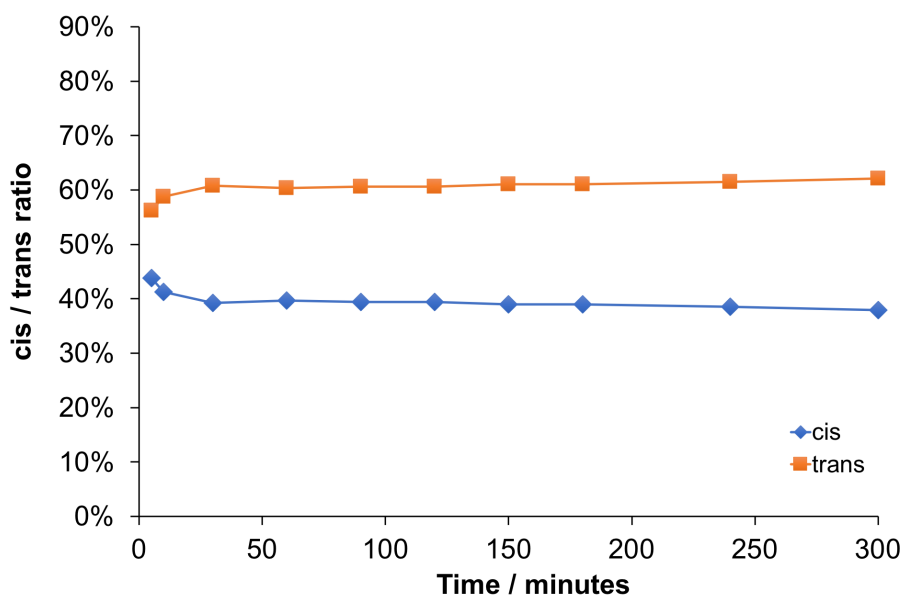

**Figure S15.** The cis-trans ratio of 4-octene vs time, *cis*-4-nonene self-metathesis catalyzed by **2** and 5 equiv. of Me<sub>4</sub>BTDP.

### Metathesis reaction of *cis*-4-nonene at 30 °C catalyzed by **2** in the presence of Me<sub>4</sub>BTDP

The catalyst **2** (3.0 mg, 0.49  $\mu$ mol of Mo) was loaded in a conical base vial with a wing shaped magnetic stirring bar. A solution of *cis*-4-nonene (0.9832 M) in toluene containing heptane as an internal standard (0.1069 M) and Me<sub>4</sub>BTDP (1 equiv.) was added to the vial. The reaction mixture was stirred at 600 rpm and kept at 30 °C using an aluminum heating block. 5  $\mu$ L of aliquots of the solution were drawn, and then diluted with pure toluene (100  $\mu$ L). The resulting solution was analyzed by GC/FID (Agilent Technologies 7890 A) equipped with an HP-5 (Agilent Technologies) column. Conversion is given by eq.2. Equilibrium conversion is reached at ca. 51%.

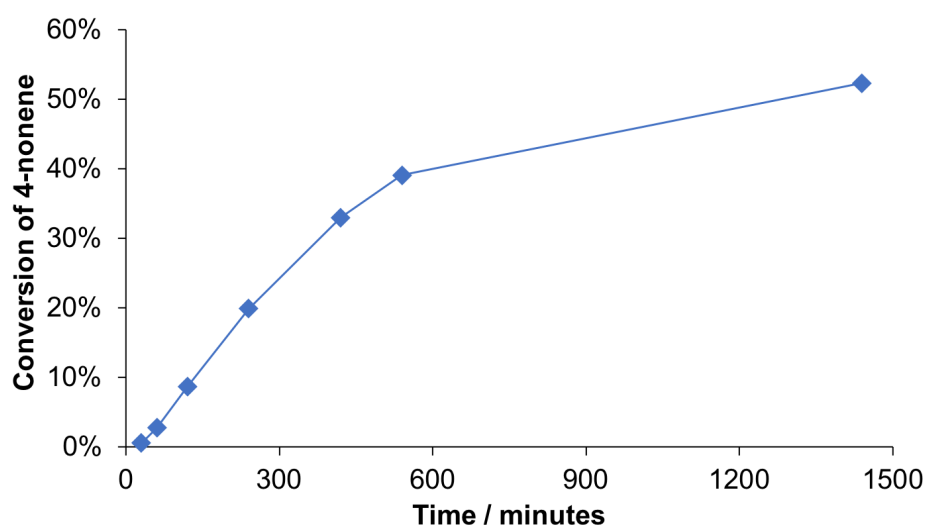

**Figure S16.** Conversion vs time, *cis*-4-nonene self-metathesis catalyzed by **2**/Me<sub>4</sub>BTDP at 30 °C.

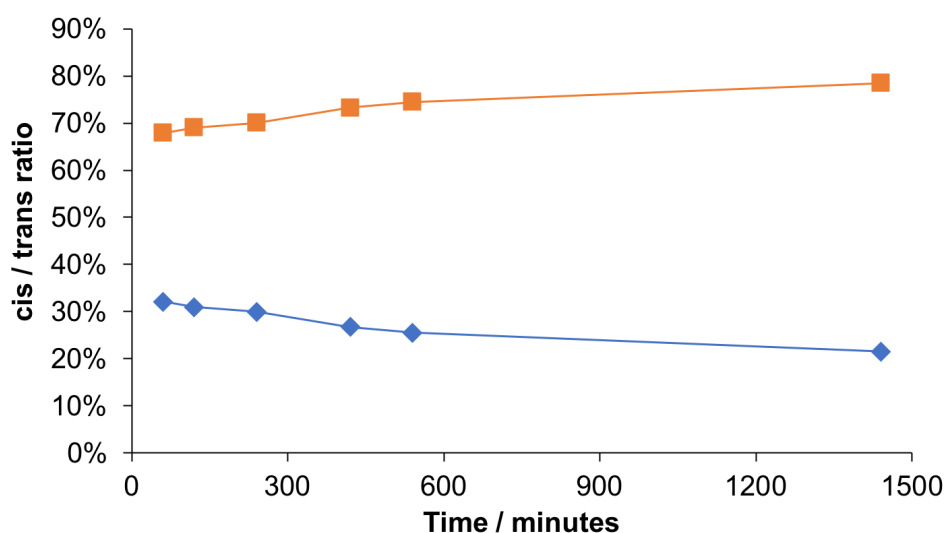

**Figure S17.** The *cis*-*trans* ratio of 4-octene vs time, *cis*-4-nonene self-metathesis catalyzed by **2**/Me<sub>4</sub>BTDP at 30 °C.

### Metathesis reaction of *cis*-4-nonene at 70 °C catalyzed by 2-(Me<sub>4</sub>BTDP)<sub>1</sub>, 2-(Me<sub>4</sub>BTDP)<sub>2</sub>

Each catalyst, **2-(Me<sub>4</sub>BTDP)<sub>1</sub>**, **2-(Me<sub>4</sub>BTDP)<sub>2</sub>** (3.0 mg, 0.49 μmol of Mo), was loaded in a conical base vial with a wing shaped magnetic stirring bar. A solution of *cis*-4-nonene (0.1069 M) in toluene containing heptane as an internal standard (0.9832 M) was added to the vial. The reaction mixture was stirred at 600 rpm and kept at 70 °C using an aluminum heating block. 5 μL of aliquots of the solution were sampled, and then diluted with pure toluene (100 μL). The resulting solution was analyzed by GC/FID (Agilent Technologies 7890 A) equipped with an HP-5 (Agilent Technologies) column. Conversion is given by eq. 2, that is without taking into account *cis*/*trans* isomerization of 4-nonene. Equilibrium conversion is reached at ca. 51%.

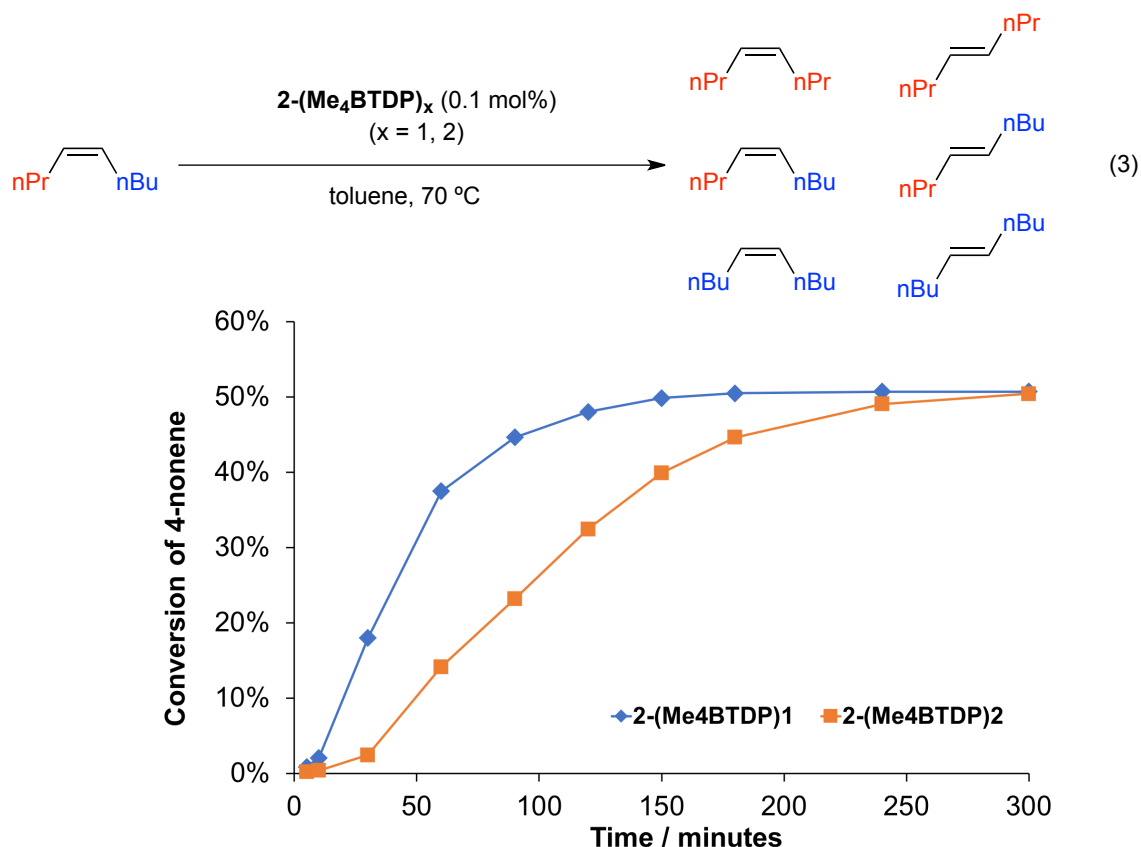

**Figure S18.** Conversion vs time, *cis*-4-nonene self-metathesis catalyzed by **2-(Me<sub>4</sub>BTDP)<sub>1</sub>** and **2-(Me<sub>4</sub>BTDP)<sub>2</sub>** at 70 °C.

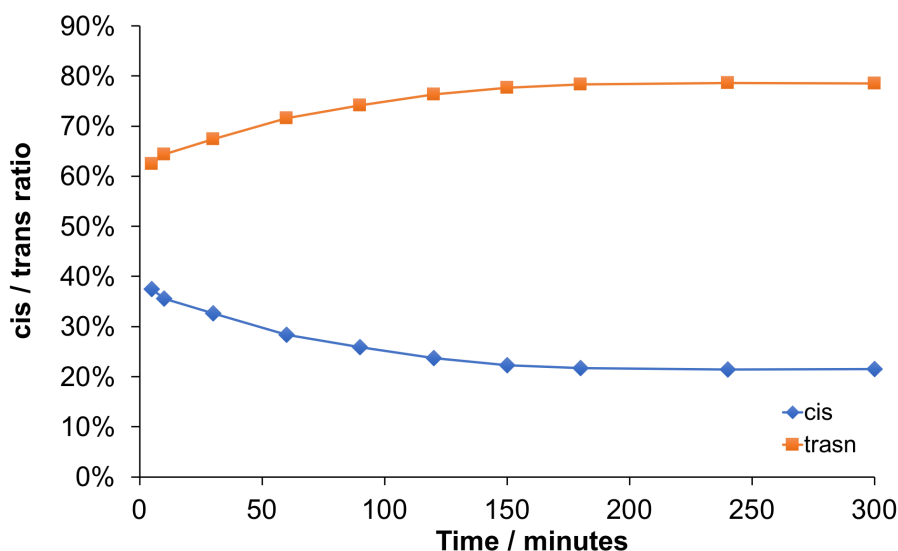

**Figure S19.** The cis-trans ratio of 4-octene vs time, *cis*-4-nonene self-metathesis catalyzed by **2-(Me<sub>4</sub>BTDP)<sub>1</sub>** at 70 °C.

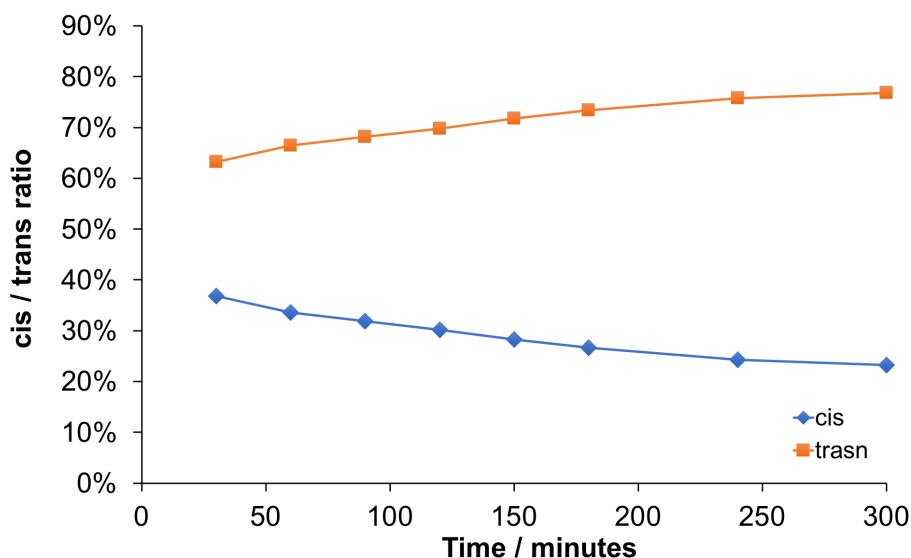

**Figure S20.** The cis-trans ratio of 4-octene vs time, *cis*-4-nonene self-metathesis catalyzed by **2-(Me<sub>4</sub>BTDP)<sub>2</sub>** at 70 °C.

#### Metathesis reaction of ethyl oleate at 70 °C by **2** in the presence of Me<sub>4</sub>BTDP

The catalyst **2** (15 mg, 2.5 μmol) was loaded in a conical base vial with a wing shaped magnetic stirring bar. A solution of ethyl oleate (0.5056 M) in toluene containing heptane as an internal standard (0.0513 M) and Me<sub>4</sub>BTDP (1 equiv. to Mo) were added to the vial. The reaction mixture was stirred at 600 rpm and kept at 70 °C using an aluminum heating block. 5 μL of aliquots of the solution were drawn, and then diluted with pure toluene (100 μL). The resulting solution was analyzed by GC/FID (Agilent Technologies 7890 A) equipped with an HP-88 (Agilent Technologies) column. Conversion is given by eq. 5, that is without taking into account cis/trans isomerization.



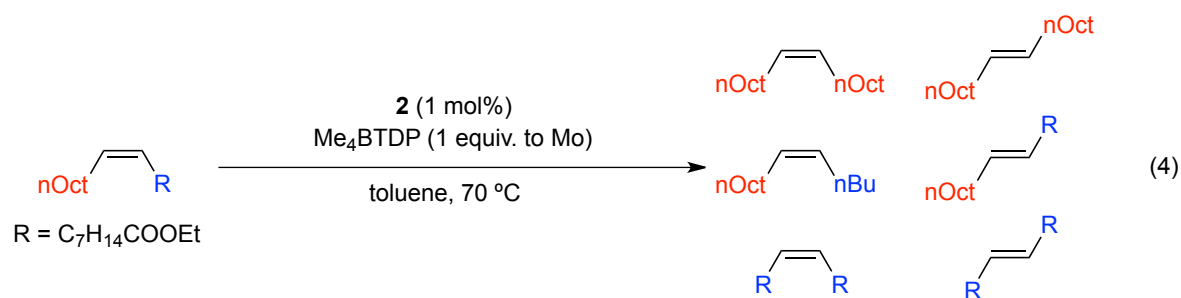

$$\text{Product conversion (t)} = \frac{[\text{cis/trans-9-octadecene}]_t + [\text{cis/trans-9-diethyl octadecenedioate}]_t}{[\text{ethyl oleate}]_{\text{int}}} \quad (5)$$

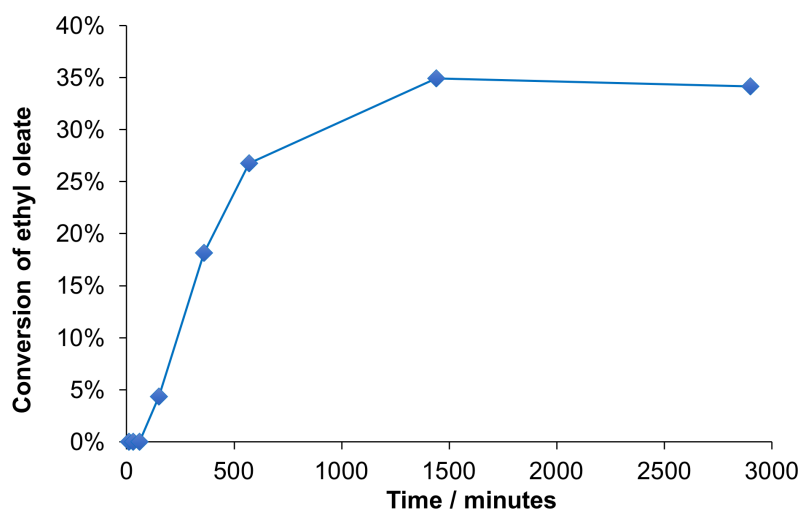

**Figure S21.** Conversion vs time, ethyl oleate self-metathesis catalyzed by **2**/Me<sub>4</sub>BTDP at 70 °C.

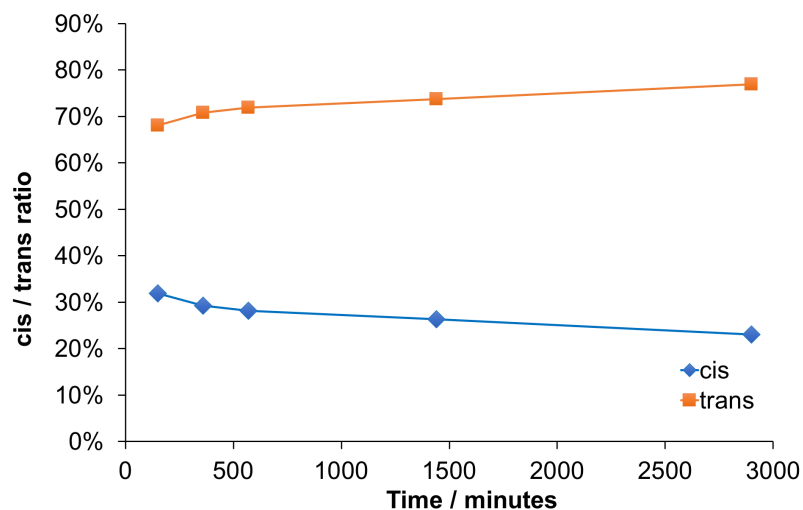

**Figure S22.** The cis-trans ratio of 9-diethyl octadecenedioate vs time, ethyl oleate self-metathesis catalyzed by **2**/Me<sub>4</sub>BTDP at 70 °C.

## J) Titration of Active Site Using Ethylene

### Exposure of 2-(Me<sub>4</sub>BTDP)<sub>1</sub> to ethylene

2-(Me<sub>4</sub>BTDP)<sub>1</sub> (100 mg) was loaded in a 30 mL glass reactor and contacted with ethylene (10 equiv to Mo). After heating the reactor at 70 °C for 2 h, the gas phase was analyzed by GC-FID, showing the presence of unreacted ethylene and 0.08 equiv of propylene.

## K) References

1. C. Copéret, A. Comas-Vives, M. P. Conley, D. P. Estes, A. Fedorov, V. Mougel, H. Nagae, F. Núñez-Zarur and P. A. Zhizhko, *Chem. Rev.*, 2016, **116**, 323.
2. O. S. Müller, J. Lützenkirchen-Hecht, D. Frahm, R., *Journal of Physics: Conference Series*, 2013, **425**, 092010.
3. D. P. Koningsberger, R. , *X-ray Absorption: Principles, Applications, Techniques of EXAFS, SEXAFS, and XANES*, Wiley, New York, 1988.
4. M. Newville, *J. Synchr. Rad.*, 2001, **8**, 322.
5. K. Dreisch, C. Andersson and C. Sta»handske, *Polyhedron*, 1992, **11**, 2143.
6. J. Jarupatrakorn, M. P. Coles and T. D. Tilley, *Chem. Mater.*, 2005, **17**, 1818.
7. W. Kaim, *J. Am. Chem. Soc.*, 1983, **105**, 707.
